# Supplementary figures and images for: Dietary advanced glycation end products may increase the incidence of allergic rhinitis depending on genetic susceptibility: a prospective cohort study
Source: Royal Society of Chemistry journal article supplement (doi:10.1039/d4fo05911e), 2025-01-01

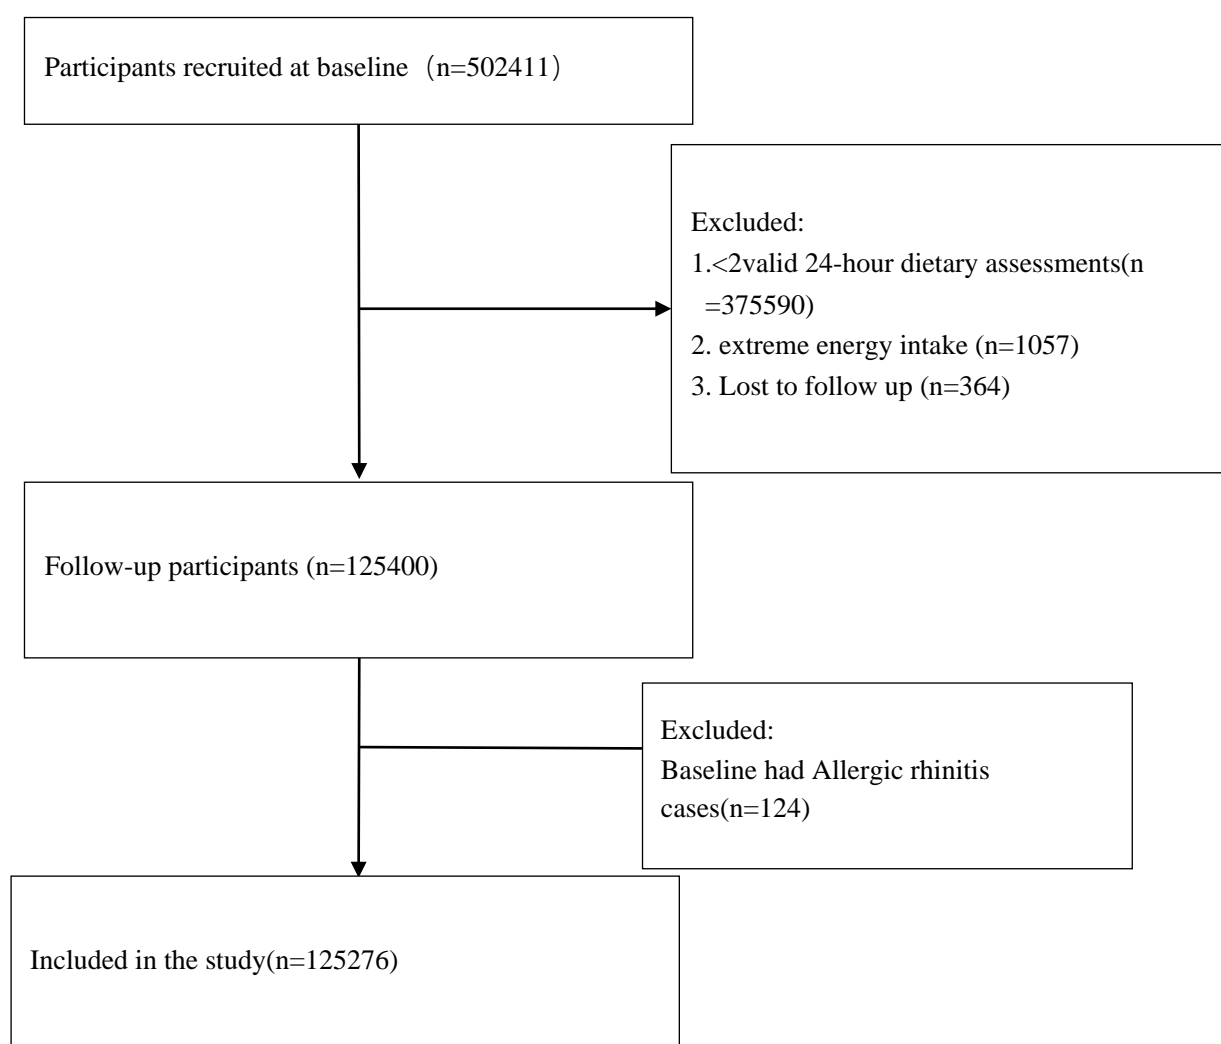

Supplement: d4fo05911e2.pdf [file d4fo05911e2.pdf]
